# Supplementary material for: Adherence to the American Cancer Society Guidelines for Cancer Survivors and Health-Related Quality of Life among Breast Cancer Survivors
Source: MDPI journal article supplement (doi:10.3390/nu11122924), 2019-12-03
Supplement: s1 [file s1]

**Table S1.** Least-squares means (LS-means)<sup>1</sup> and 95% confidence intervals (CIs) of HRQoL scores according to the quintiles of adherence scores among breast cancer survivors by menopausal status at diagnosis

| <b>LS-means (95% CI) of HRQoL Scores among Breast Cancer Survivors with Premenopausal Status (n=407)</b>  |                        |                     |                     |                     |                          |                                 |
|-----------------------------------------------------------------------------------------------------------|------------------------|---------------------|---------------------|---------------------|--------------------------|---------------------------------|
| <i>n</i> (Adherence scores, range)                                                                        | <b>Q1</b><br>101 (3–6) | <b>Q2</b><br>64 (7) | <b>Q3</b><br>77 (8) | <b>Q4</b><br>63 (9) | <b>Q5</b><br>102 (10–12) | <i>p</i> for trend <sup>2</sup> |
| Physical component summary                                                                                | 46.29 (44.47–48.11)    | 47.98 (45.92–50.04) | 49.23 (47.21–51.24) | 48.67 (46.51–50.82) | 49.57 (47.59–51.55)      | 0.001 <sup>3</sup>              |
| Physical health sub-scales                                                                                |                        |                     |                     |                     |                          |                                 |
| Physical functioning                                                                                      | 44.51 (42.61–46.41)    | 46.18 (44.03–48.32) | 47.11 (45.01–49.21) | 48.73 (46.48–50.98) | 48.47 (46.41–50.53)      | <0.001 <sup>3</sup>             |
| Role-physical                                                                                             | 44.39 (42.04–46.73)    | 45.79 (43.14–48.44) | 47.41 (44.82–50.00) | 45.36 (42.58–48.14) | 46.33 (43.79–48.88)      | 0.17                            |
| Bodily pain                                                                                               | 47.22 (44.83–49.61)    | 49.86 (47.16–52.56) | 50.02 (47.38–52.66) | 49.42 (46.59–52.26) | 50.28 (47.69–52.87)      | 0.04 <sup>3</sup>               |
| General health                                                                                            | 46.34 (44.03–48.65)    | 47.37 (44.77–49.98) | 49.29 (46.75–51.84) | 46.42 (43.69–49.15) | 47.71 (45.21–50.21)      | 0.39                            |
| Mental component summary                                                                                  | 45.04 (42.41–47.68)    | 46.64 (43.65–49.62) | 46.98 (44.06–49.89) | 45.66 (42.54–48.78) | 45.84 (42.98–48.70)      | 0.73                            |
| Mental health sub-scales                                                                                  |                        |                     |                     |                     |                          |                                 |
| Vitality                                                                                                  | 44.57 (41.78–47.37)    | 47.84 (44.68–50.99) | 47.97 (44.88–51.06) | 47.26 (43.95–50.57) | 49.08 (46.05–52.11)      | 0.01 <sup>3</sup>               |
| Social functioning                                                                                        | 48.87 (46.74–51.00)    | 49.15 (46.74–51.56) | 50.07 (47.71–52.43) | 49.10 (46.58–51.63) | 48.99 (46.68–51.30)      | 0.91                            |
| Role-emotional                                                                                            | 42.95 (40.23–45.66)    | 45.63 (42.56–48.70) | 45.07 (42.06–48.07) | 43.97 (40.76–47.19) | 43.88 (40.93–46.82)      | 0.78                            |
| Mental health                                                                                             | 44.66 (42.02–47.30)    | 45.50 (42.52–48.48) | 47.09 (44.18–50.01) | 46.26 (43.14–49.39) | 46.24 (43.38–49.11)      | 0.22                            |
| <b>LS-means (95% CI) of HRQoL Scores among Breast Cancer Survivors with Postmenopausal Status (n=211)</b> |                        |                     |                     |                     |                          |                                 |
| <i>n</i> (Adherence scores, range)                                                                        | <b>Q1</b><br>50 (3–6)  | <b>Q2</b><br>38 (7) | <b>Q3</b><br>34 (8) | <b>Q4</b><br>39 (9) | <b>Q5</b><br>50 (10–12)  | <i>p</i> for trend <sup>2</sup> |
| Physical component summary                                                                                | 46.45 (43.26–49.65)    | 44.16 (40.62–47.69) | 46.03 (42.65–49.41) | 47.86 (44.34–51.38) | 47.80 (44.61–50.99)      | 0.12                            |
| Physical health sub-scales                                                                                |                        |                     |                     |                     |                          |                                 |
| Physical functioning                                                                                      | 43.39 (40.00–46.79)    | 42.52 (38.76–46.28) | 43.01 (39.42–46.61) | 44.76 (41.02–48.50) | 45.73 (42.33–49.12)      | 0.09                            |
| Role-physical                                                                                             | 47.33 (43.39–51.28)    | 46.04 (41.68–50.41) | 47.89 (43.72–52.07) | 47.68 (43.33–52.02) | 47.85 (43.90–51.79)      | 0.60                            |
| Bodily pain                                                                                               | 46.74 (42.54–50.94)    | 44.44 (39.79–49.09) | 47.97 (43.53–52.41) | 49.99 (45.37–54.62) | 48.29 (44.10–52.49)      | 0.12                            |
| General health                                                                                            | 42.97 (38.84–47.09)    | 41.32 (36.75–45.88) | 40.24 (35.88–44.60) | 43.55 (39.01–48.09) | 44.75 (40.63–48.87)      | 0.26                            |
| Mental component summary                                                                                  | 43.21 (38.90–47.52)    | 44.49 (39.73–49.26) | 44.13 (39.57–48.68) | 44.47 (39.72–49.21) | 45.21 (40.91–49.51)      | 0.40                            |
| Mental health sub-scales                                                                                  |                        |                     |                     |                     |                          |                                 |
| Vitality                                                                                                  | 45.04 (40.33–49.75)    | 44.57 (39.35–49.78) | 46.81 (41.82–51.79) | 46.85 (41.66–52.04) | 45.70 (41.00–50.41)      | 0.55                            |
| Social functioning                                                                                        | 46.18 (42.52–49.85)    | 46.53 (42.47–50.58) | 46.57 (42.70–50.45) | 47.59 (43.55–51.62) | 49.77 (46.11–53.43)      | 0.05                            |
| Role-emotional                                                                                            | 44.55 (40.02–49.07)    | 44.81 (39.80–49.81) | 43.29 (38.50–48.08) | 45.82 (40.84–50.80) | 46.00 (41.48–50.52)      | 0.47                            |
| Mental health                                                                                             | 40.73 (35.96–45.50)    | 41.92 (36.64–47.20) | 42.79 (37.74–47.83) | 41.93 (36.67–47.18) | 42.85 (38.08–47.61)      | 0.41                            |

Abbreviations: LS-means, least-squares means; CIs, confidence intervals; HRQoL, health-related quality of life; <sup>1</sup> Models were adjusted for age (years; continuous), energy intake (kcal/day; continuous), stage (I, II, or III), time since surgery (1 to <2 years, 2 to <5 years, or ≥5 years), education level (elementary school or below, middle school, high school, or college or above), dietary supplement use (yes or no), alcohol intake (current, past, or never), smoking status (never or ever), and center.; <sup>2</sup> *p* for trend was calculated using the median value of each quintile category as a continuous variable.; <sup>3</sup> *p* for trend remained significant at  $\alpha=0.1$  after adjusting for multiple comparisons with FDR method.

**Table S2.** Least-squares means (LS-means)<sup>1</sup> and 95% confidence intervals (CIs) of HRQoL scores according to the quintiles of physical activity levels among breast cancer survivors by menopausal status at diagnosis

| <b>LS-means (95% CI) of HRQoL Scores among Breast Cancer Survivors with Premenopausal Status (n=407)</b>  |                     |                     |                     |                     |                     |                                 |
|-----------------------------------------------------------------------------------------------------------|---------------------|---------------------|---------------------|---------------------|---------------------|---------------------------------|
|                                                                                                           | <b>Q1</b>           | <b>Q2</b>           | <b>Q3</b>           | <b>Q4</b>           | <b>Q5</b>           | <i>p</i> for trend <sup>3</sup> |
| <i>n</i> (Physical activity, median) <sup>2</sup>                                                         | 83 (3.68)           | 83 (14.00)          | 74 (23.78)          | 85 (39.69)          | 82 (69.09)          |                                 |
| Physical component summary                                                                                | 46.94 (45.07–48.80) | 47.74 (45.77–49.70) | 48.13 (46.04–50.23) | 48.85 (46.79–50.92) | 49.59 (47.57–51.62) | 0.01 <sup>4</sup>               |
| Physical health sub-scales                                                                                |                     |                     |                     |                     |                     |                                 |
| Physical functioning                                                                                      | 45.27 (43.31–47.22) | 46.52 (44.45–48.58) | 46.53 (44.34–48.73) | 46.96 (44.80–49.13) | 48.50 (46.38–50.62) | 0.01 <sup>4</sup>               |
| Role-physical                                                                                             | 45.99 (43.59–48.39) | 45.61 (43.08–48.14) | 44.93 (42.24–47.62) | 45.66 (43.01–48.31) | 45.80 (43.20–48.40) | 0.98                            |
| Bodily pain                                                                                               | 47.93 (45.49–50.37) | 49.09 (46.52–51.66) | 48.86 (46.12–51.59) | 49.94 (47.24–52.63) | 50.56 (47.91–53.20) | 0.06                            |
| General health                                                                                            | 46.77 (44.43–49.12) | 46.57 (44.10–49.04) | 46.57 (43.94–49.20) | 48.42 (45.83–51.02) | 48.94 (46.40–51.48) | 0.03 <sup>4</sup>               |
| Mental component summary                                                                                  | 46.37 (43.69–49.05) | 45.76 (42.94–48.58) | 44.20 (41.19–47.20) | 46.13 (43.17–49.09) | 46.59 (43.69–49.49) | 0.62                            |
| Mental health sub-scales                                                                                  |                     |                     |                     |                     |                     |                                 |
| Vitality                                                                                                  | 45.51 (42.67–48.36) | 46.19 (43.19–49.19) | 46.88 (43.69–50.07) | 48.46 (45.31–51.61) | 49.39 (46.30–52.47) | 0.01 <sup>4</sup>               |
| Social functioning                                                                                        | 49.73 (47.58–51.89) | 48.62 (46.35–50.89) | 47.45 (45.04–49.87) | 49.88 (47.50–52.26) | 49.83 (47.50–52.17) | 0.42                            |
| Role-emotional                                                                                            | 44.45 (41.69–47.22) | 44.85 (41.93–47.76) | 42.62 (39.52–45.72) | 43.68 (40.62–46.74) | 44.41 (41.42–47.41) | 0.91                            |
| Mental health                                                                                             | 46.03 (43.35–48.71) | 45.43 (42.60–48.26) | 44.31 (41.30–47.31) | 45.89 (42.92–48.86) | 46.66 (43.76–49.57) | 0.45                            |
| <b>LS-means (95% CI) of HRQoL Scores among Breast Cancer Survivors with Postmenopausal Status (n=211)</b> |                     |                     |                     |                     |                     |                                 |
|                                                                                                           | <b>Q1</b>           | <b>Q2</b>           | <b>Q3</b>           | <b>Q4</b>           | <b>Q5</b>           | <i>p</i> for trend <sup>3</sup> |
| <i>n</i> (Physical activity, median) <sup>2</sup>                                                         | 42 (4.96)           | 38 (12.76)          | 51 (24.50)          | 39 (40.75)          | 41 (74.47)          |                                 |
| Physical component summary                                                                                | 47.51 (44.31–50.70) | 45.55 (42.15–48.95) | 45.36 (42.15–48.57) | 46.25 (42.83–49.68) | 49.21 (45.75–52.67) | 0.07                            |
| Physical health sub-scales                                                                                |                     |                     |                     |                     |                     |                                 |
| Physical functioning                                                                                      | 44.52 (41.12–47.93) | 42.21 (38.58–45.84) | 44.04 (40.62–47.46) | 43.62 (39.97–47.27) | 45.99 (42.30–49.67) | 0.15                            |
| Role-physical                                                                                             | 48.36 (44.46–52.26) | 47.40 (43.24–51.55) | 46.54 (42.62–50.45) | 45.65 (41.46–49.83) | 50.54 (46.31–54.76) | 0.18                            |
| Bodily pain                                                                                               | 48.25 (44.05–52.44) | 47.42 (42.95–51.89) | 44.41 (40.19–48.62) | 49.39 (44.89–53.89) | 49.54 (45.00–54.08) | 0.18                            |
| General health                                                                                            | 44.71 (40.74–48.68) | 38.47 (34.24–42.71) | 40.57 (36.58–44.56) | 43.61 (39.35–47.87) | 47.03 (42.72–51.33) | 0.005 <sup>4</sup>              |
| Mental component summary                                                                                  | 45.32 (41.08–49.55) | 41.48 (36.97–45.99) | 42.74 (38.49–46.99) | 45.55 (41.01–50.09) | 47.24 (42.65–51.82) | 0.05                            |
| Mental health sub-scales                                                                                  |                     |                     |                     |                     |                     |                                 |
| Vitality                                                                                                  | 47.11 (42.49–51.74) | 42.55 (37.62–47.48) | 44.57 (39.93–49.22) | 46.26 (41.30–51.23) | 49.66 (44.65–54.67) | 0.03                            |
| Social functioning                                                                                        | 48.20 (44.54–51.86) | 45.42 (41.52–49.32) | 46.27 (42.60–49.95) | 48.32 (44.40–52.25) | 49.82 (45.85–53.78) | 0.07                            |
| Role-emotional                                                                                            | 45.16 (40.67–49.66) | 44.12 (39.34–48.91) | 43.61 (39.10–48.12) | 44.19 (39.37–49.01) | 48.41 (43.55–53.28) | 0.07                            |
| Mental health                                                                                             | 43.55 (38.85–48.24) | 38.61 (33.61–43.62) | 40.33 (35.62–45.05) | 44.32 (39.28–49.35) | 44.04 (38.96–49.13) | 0.15                            |

Abbreviations: LS-means, least-squares means; CIs, confidence intervals; HRQoL, health-related quality of life; <sup>1</sup> Models were adjusted for age (years; continuous), energy intake (kcal/day; continuous), stage (I, II, or III), time since surgery (1 to <2 years, 2 to <5 years, or ≥5 years), education level (elementary school or below, middle school, high school, or college or above), dietary supplement use (yes or no), alcohol intake (current, past, or never), smoking status (never or ever), and center.; <sup>2</sup> Physical activity levels (MET-hours/week; continuous); <sup>3</sup> *p* for trend was calculated using the median value of each quintile category as a continuous variable.; <sup>4</sup> *p* for trend remained significant at α=0.1 after adjusting for multiple comparisons with FDR method.

**Table S3.** Least-squares means (LS-means)<sup>1</sup> and 95% confidence intervals (CIs) of HRQoL scores according to BMI scores<sup>2</sup> among breast cancer survivors by stage

| <b>LS-means (95% CI) of HRQoL Scores among Breast Cancer Survivors with Stage I (n=307)</b>      |                                |                     |                     |                     |                                 |
|--------------------------------------------------------------------------------------------------|--------------------------------|---------------------|---------------------|---------------------|---------------------------------|
|                                                                                                  | <b>1</b>                       | <b>2</b>            | <b>3</b>            | <b>4</b>            | <i>p</i> for trend <sup>4</sup> |
| <i>n</i> (BMI, median)                                                                           | 18 (18.06, 31.65) <sup>3</sup> | 67 (26.45)          | 67 (23.94)          | 155 (21.33)         |                                 |
| Physical component summary <sup>5</sup>                                                          | 50.17 (46.81–53.53)            | 47.64 (45.58–49.69) | 49.96 (47.74–52.18) | 48.92 (47.13–50.72) | 0.24                            |
| Physical health sub-scales                                                                       |                                |                     |                     |                     |                                 |
| Physical functioning                                                                             | 47.40 (43.83–50.97)            | 46.13 (43.95–48.32) | 48.75 (46.39–51.12) | 48.00 (46.09–49.90) | 0.25                            |
| Role-physical                                                                                    | 51.54 (47.39–55.69)            | 47.08 (44.54–49.62) | 49.15 (46.41–51.89) | 48.83 (46.62–51.05) | 0.08                            |
| Bodily pain                                                                                      | 50.31 (45.48–55.14)            | 48.05 (45.09–51.01) | 49.60 (46.40–52.79) | 49.13 (46.55–51.71) | 0.43                            |
| General health                                                                                   | 42.99 (38.70–47.28)            | 45.72 (43.09–48.35) | 44.89 (42.05–47.73) | 44.29 (42.00–46.59) | 0.16                            |
| Mental component summary                                                                         | 44.33 (39.76–48.90)            | 46.18 (43.38–48.98) | 44.40 (41.38–47.42) | 45.20 (42.76–47.64) | 0.52                            |
| Mental health sub-scales                                                                         |                                |                     |                     |                     |                                 |
| Vitality <sup>5</sup>                                                                            | 47.48 (42.17–52.80)            | 47.29 (44.03–50.55) | 46.34 (42.82–49.86) | 44.99 (42.15–47.83) | 0.29                            |
| Social functioning                                                                               | 49.52 (45.71–53.33)            | 49.66 (47.32–52.00) | 49.40 (46.87–51.92) | 50.39 (48.35–52.43) | 0.55                            |
| Role-emotional                                                                                   | 46.26 (41.41–51.11)            | 45.11 (42.14–48.08) | 46.06 (42.85–49.26) | 46.04 (43.45–48.64) | 0.55                            |
| Mental health                                                                                    | 42.15 (37.11–47.19)            | 44.90 (41.81–47.99) | 43.06 (39.72–46.40) | 44.26 (41.56–46.95) | 0.59                            |
| <b>LS-means (95% CI) of HRQoL Scores among Breast Cancer Survivors with Stage II–III (n=311)</b> |                                |                     |                     |                     |                                 |
|                                                                                                  | <b>1</b>                       | <b>2</b>            | <b>3</b>            | <b>4</b>            | <i>p</i> for trend <sup>4</sup> |
| <i>n</i> (BMI, median)                                                                           | 15 (18.29, 31.04) <sup>3</sup> | 75 (26.45)          | 80 (23.83)          | 141 (21.33)         |                                 |
| Physical component summary <sup>5</sup>                                                          | 45.86 (41.85–49.88)            | 45.25 (42.94–47.56) | 48.04 (45.70–50.37) | 48.37 (46.22–50.53) | 0.01 <sup>6</sup>               |
| Physical health sub-scales                                                                       |                                |                     |                     |                     |                                 |
| Physical functioning                                                                             | 46.22 (42.08–50.37)            | 43.12 (40.73–45.51) | 45.65 (43.24–48.06) | 46.43 (44.21–48.66) | 0.04 <sup>6</sup>               |
| Role-physical                                                                                    | 42.01 (36.82–47.20)            | 43.40 (40.41–46.39) | 45.31 (42.30–48.33) | 45.94 (43.15–48.72) | 0.03 <sup>6</sup>               |
| Bodily pain                                                                                      | 44.72 (39.85–49.59)            | 48.82 (46.01–51.62) | 50.07 (47.24–52.90) | 50.62 (48.00–53.23) | 0.02 <sup>6</sup>               |
| General health                                                                                   | 43.54 (38.34–48.74)            | 45.86 (42.87–48.86) | 47.11 (44.09–50.14) | 46.04 (43.25–48.83) | 0.15                            |
| Mental component summary                                                                         | 42.16 (36.37–47.94)            | 47.29 (43.95–50.63) | 45.64 (42.27–49.00) | 45.79 (42.68–48.90) | 0.93                            |
| Mental health sub-scales                                                                         |                                |                     |                     |                     |                                 |
| Vitality <sup>5</sup>                                                                            | 45.07 (39.17–50.97)            | 48.10 (44.71–51.50) | 48.63 (45.20–52.06) | 48.85 (45.68–52.01) | 0.28                            |
| Social functioning                                                                               | 46.37 (41.65–51.08)            | 48.04 (45.32–50.76) | 47.64 (44.89–50.38) | 48.03 (45.50–50.56) | 0.67                            |
| Role-emotional                                                                                   | 42.32 (36.30–48.34)            | 44.91 (41.44–48.38) | 43.83 (40.33–47.33) | 44.30 (41.07–47.53) | 0.88                            |
| Mental health                                                                                    | 40.03 (34.30–45.77)            | 45.68 (42.37–48.98) | 45.18 (41.84–48.51) | 45.35 (42.27–48.42) | 0.34                            |

Abbreviations: LS-means, least-squares means; CIs, confidence intervals; HRQoL, health-related quality of life; BMI, body mass index; <sup>1</sup> Models were adjusted for age (years; continuous), energy intake (kcal/day; continuous), menopausal status at diagnosis (premenopausal or postmenopausal status), time since surgery (1 to <2 years, 2 to <5 years, or ≥5 years), education level (elementary school or below, middle school, high school, or college or above), dietary supplement use (yes or no), alcohol intake (current, past, or never), smoking status (never or ever), and center. In the analysis of stage II–III, we additionally adjusted for stage (II or III).; <sup>2</sup> BMI scores, 1 (<18.5 or ≥30 kg/m<sup>2</sup>); 2 (25–<30 kg/m<sup>2</sup>); 3 (23–<25 kg/m<sup>2</sup>); 4 (18.5–<23 kg/m<sup>2</sup>); <sup>3</sup> Median values for <18.5 kg/m<sup>2</sup> and ≥30 kg/m<sup>2</sup>; <sup>4</sup> *p* for trend was calculated using the median value of each category as a continuous variable.; <sup>5</sup> *p* for interaction was statistically significant (<0.05).; <sup>6</sup> *p* for trend remained significant at  $\alpha=0.1$  after adjusting for multiple comparisons with false discovery rate method.

**Table S4.** Least-squares means (LS-means)<sup>1</sup> and 95% confidence intervals (CIs) of HRQoL scores according to the quintiles of diet scores<sup>2</sup> among breast cancer survivors by stage

| <b>LS-means (95% CI) of HRQoL Scores among Breast Cancer Survivors with Stage I (n=307)</b>      |                     |                     |                     |                     |                     |                                 |
|--------------------------------------------------------------------------------------------------|---------------------|---------------------|---------------------|---------------------|---------------------|---------------------------------|
| <i>n</i> (Diet scores, range)                                                                    | Q1<br>49 (3–5)      | Q2<br>45 (6)        | Q3<br>108 (7–8)     | Q4<br>51 (9)        | Q5<br>54 (10–12)    | <i>p</i> for trend <sup>3</sup> |
| Physical component summary <sup>4</sup>                                                          | 48.68 (46.19–51.18) | 50.22 (47.92–52.52) | 48.00 (46.03–49.97) | 48.18 (45.86–50.51) | 48.91 (46.56–51.26) | 0.58                            |
| Physical health sub-scales                                                                       |                     |                     |                     |                     |                     |                                 |
| Physical functioning                                                                             | 47.06 (44.41–49.70) | 48.10 (45.66–50.53) | 46.90 (44.81–48.98) | 46.30 (43.84–48.76) | 49.39 (46.90–51.87) | 0.53                            |
| Role-physical <sup>4</sup>                                                                       | 48.20 (45.11–51.29) | 50.25 (47.40–53.10) | 47.88 (45.44–50.31) | 48.42 (45.54–51.29) | 47.90 (44.99–50.81) | 0.57                            |
| Bodily pain <sup>4</sup>                                                                         | 48.54 (44.99–52.09) | 51.60 (48.33–54.87) | 47.73 (44.94–50.53) | 49.81 (46.50–53.11) | 46.79 (43.46–50.13) | 0.31                            |
| General health                                                                                   | 44.61 (41.42–47.80) | 44.88 (41.93–47.82) | 45.01 (42.50–47.53) | 43.57 (40.60–46.54) | 45.07 (42.07–48.07) | 0.93                            |
| Mental component summary                                                                         | 44.59 (41.20–47.99) | 45.90 (42.76–49.03) | 44.97 (42.29–47.64) | 45.91 (42.75–49.07) | 44.88 (41.69–48.08) | 0.84                            |
| Mental health sub-scales                                                                         |                     |                     |                     |                     |                     |                                 |
| Vitality                                                                                         | 45.73 (41.78–49.68) | 46.94 (43.29–50.58) | 44.70 (41.58–47.81) | 46.89 (43.21–50.56) | 46.94 (43.23–50.66) | 0.73                            |
| Social functioning <sup>4</sup>                                                                  | 50.07 (47.24–52.89) | 51.11 (48.51–53.72) | 49.18 (46.95–51.40) | 50.31 (47.68–52.93) | 49.21 (46.55–51.87) | 0.49                            |
| Role-emotional <sup>4</sup>                                                                      | 45.08 (41.49–48.68) | 46.81 (43.49–50.13) | 45.66 (42.82–48.49) | 45.33 (41.98–48.68) | 45.47 (42.08–48.85) | 0.94                            |
| Mental health                                                                                    | 42.98 (39.23–46.73) | 44.59 (41.13–48.05) | 43.92 (40.96–46.87) | 44.69 (41.20–48.18) | 43.81 (40.28–47.34) | 0.65                            |
| <b>LS-means (95% CI) of HRQoL Scores among Breast Cancer Survivors with Stage II–III (n=311)</b> |                     |                     |                     |                     |                     |                                 |
| <i>n</i> (Diet scores, range)                                                                    | 59 (3–5)            | 45 (6)              | 98 (7–8)            | 47 (9)              | 62 (10–12)          | <i>p</i> for trend <sup>3</sup> |
| Physical component summary <sup>4</sup>                                                          | 45.97 (43.37–48.57) | 45.81 (43.17–48.45) | 46.93 (44.56–49.30) | 48.81 (46.09–51.52) | 48.94 (46.36–51.52) | 0.01 <sup>5</sup>               |
| Physical health sub-scales                                                                       |                     |                     |                     |                     |                     |                                 |
| Physical functioning                                                                             | 44.60 (41.92–47.28) | 43.19 (40.47–45.92) | 45.17 (42.73–47.61) | 46.74 (43.94–49.54) | 47.30 (44.64–49.95) | 0.01 <sup>5</sup>               |
| Role-physical <sup>4</sup>                                                                       | 42.62 (39.29–45.95) | 43.07 (39.68–46.45) | 45.11 (42.07–48.14) | 46.97 (43.48–50.45) | 46.60 (43.30–49.90) | 0.01 <sup>5</sup>               |
| Bodily pain <sup>4</sup>                                                                         | 47.96 (44.83–51.10) | 47.47 (44.29–50.65) | 49.92 (47.07–52.77) | 50.49 (47.22–53.76) | 52.14 (49.04–55.25) | 0.01 <sup>5</sup>               |
| General health                                                                                   | 45.30 (41.96–48.65) | 45.57 (42.17–48.96) | 45.66 (42.61–48.70) | 48.59 (45.10–52.08) | 45.71 (42.40–49.02) | 0.52                            |
| Mental component summary                                                                         | 44.45 (40.72–48.18) | 44.57 (40.78–48.36) | 45.98 (42.58–49.38) | 47.91 (44.01–51.81) | 47.21 (43.51–50.91) | 0.10                            |
| Mental health sub-scales                                                                         |                     |                     |                     |                     |                     |                                 |
| Vitality                                                                                         | 45.50 (41.75–49.26) | 47.73 (43.92–51.54) | 47.09 (43.67–50.51) | 51.37 (47.44–55.29) | 50.30 (46.58–54.02) | 0.01 <sup>5</sup>               |
| Social functioning <sup>4</sup>                                                                  | 47.30 (44.28–50.31) | 47.18 (44.12–50.25) | 46.42 (43.67–49.17) | 48.59 (45.43–51.74) | 49.76 (46.77–52.75) | 0.05 <sup>5</sup>               |
| Role-emotional <sup>4</sup>                                                                      | 42.79 (38.93–46.64) | 41.95 (38.03–45.87) | 44.93 (41.42–48.44) | 46.11 (42.09–50.14) | 46.11 (42.29–49.93) | 0.06 <sup>5</sup>               |
| Mental health                                                                                    | 43.70 (40.01–47.40) | 43.05 (39.29–46.80) | 45.96 (42.60–49.32) | 47.04 (43.18–50.90) | 45.87 (42.21–49.53) | 0.19                            |

Abbreviations: LS-means, least-squares means; CIs, confidence intervals; HRQoL, health-related quality of life; <sup>1</sup> Models were adjusted for age (years; continuous), energy intake (kcal/day; continuous), menopausal status at diagnosis (premenopausal or postmenopausal status), time since surgery (1 to <2 years, 2 to <5 years, or 5 years or more), education level (elementary school or below, middle school, high school, or college or above), dietary supplement use (yes or no), alcohol intake (current, past, or never), smoking status (never or ever), and center. In the analysis of stage II–III, we additionally adjusted for stage (II or III); <sup>2</sup> Diet scores were calculated by summing each score from the three food groups.; <sup>3</sup> *p* for trend was calculated using the median value of each quintile category as a continuous variable.; <sup>4</sup> *p* for interaction was statistically significant (<0.05).; <sup>5</sup> *p* for trend remained significant at  $\alpha=0.1$  after adjusting for multiple comparisons with false discovery rate method.
